# Supplementary material for: Identification of a Ferroptosis-Related Signature Associated with Prognosis and Immune Infiltration in Adrenocortical Carcinoma
Source: Hindawi journal article supplement (doi:10.1155/2021/4654302), 2021-07-20
Supplement: f1 [file 4654302.f1.pdf]

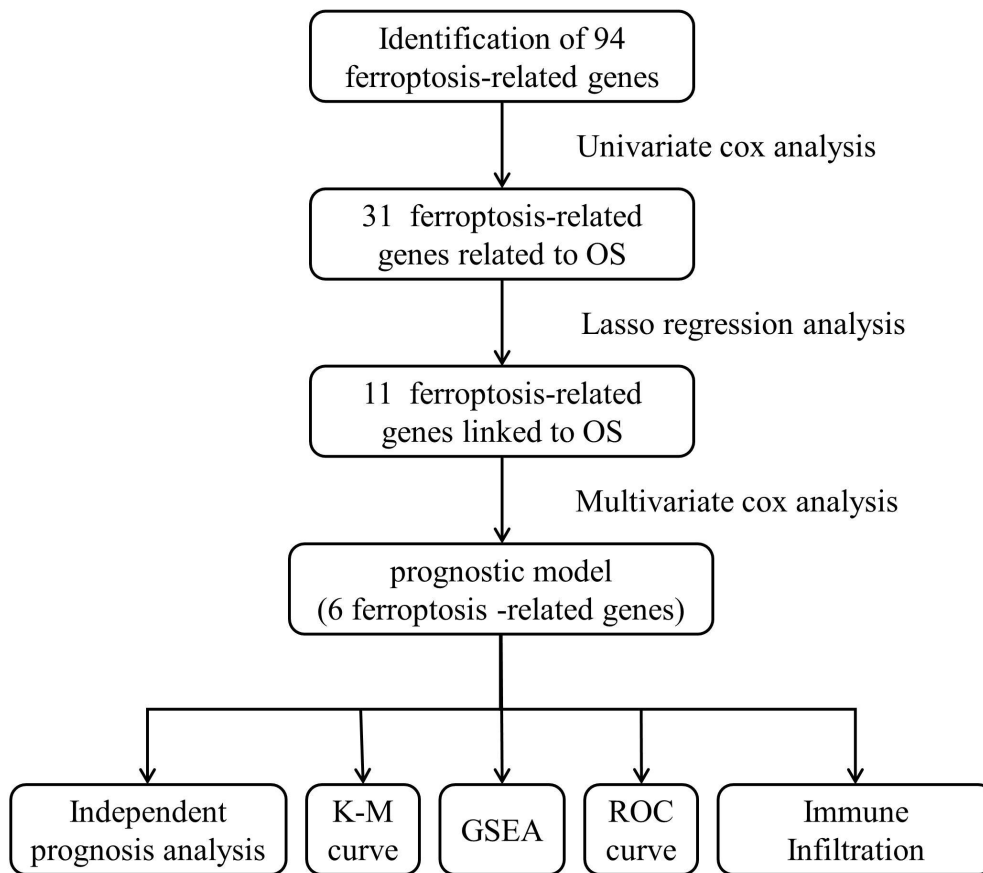

**Figure S1.** Flow chart of the study.

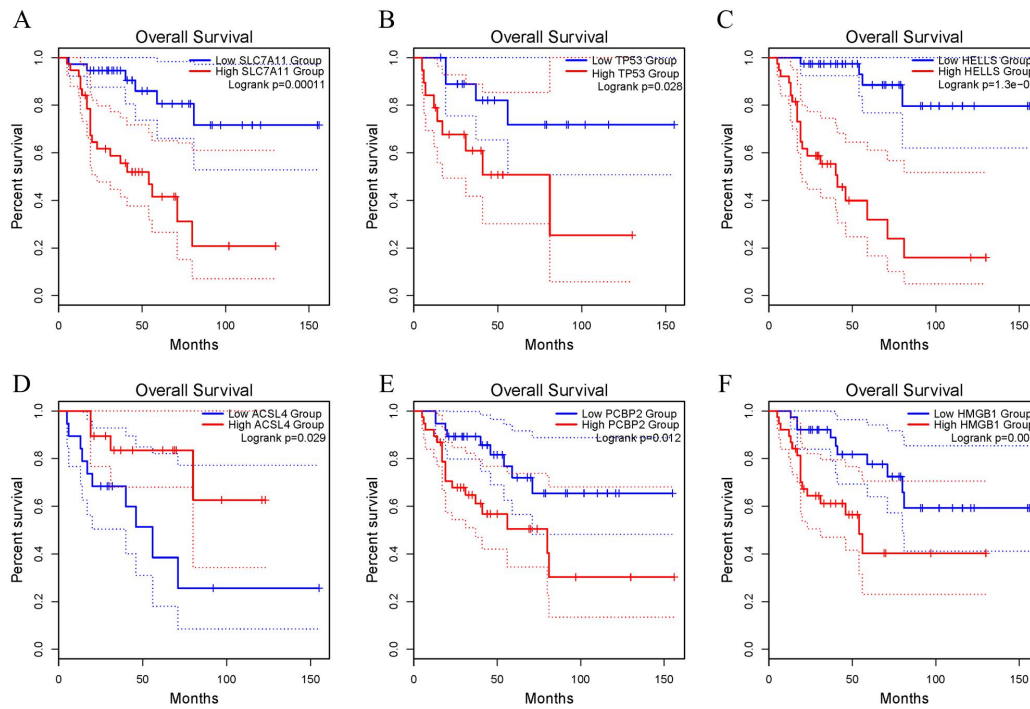

**Figure S2.** K-M curves for each of the 6 hub genes in ACC patients.

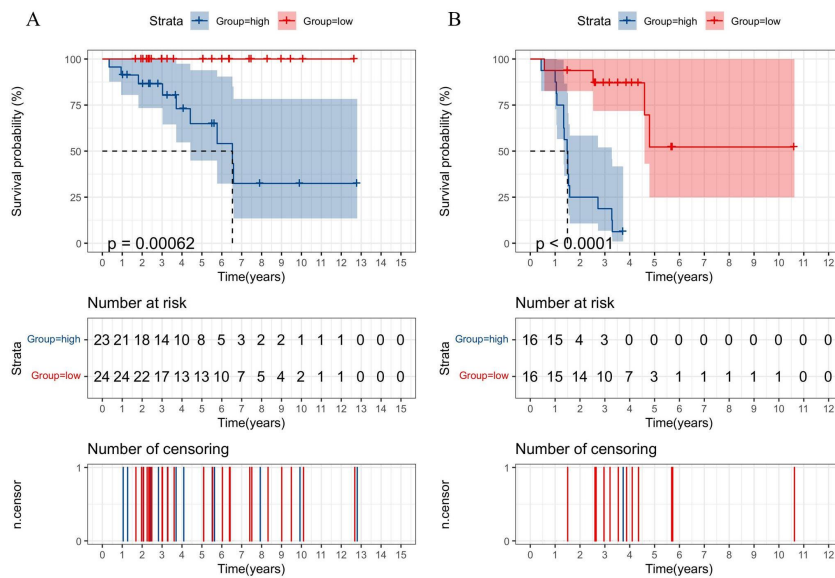

**Figure S3.** Kaplan-Meier curves for patients assigned to high and low risk groups based on the risk score in TCGA cohort.

**A.** K-M curve of patient in stage 1-2 group; **B.** K-M curve of patient in stage 3-4 group;

**Table S1.** Clinical characteristics of ACC patients in the TCGA and GEO.

| Characteristics | Subgroup   | TCGA(n=79) | GEO(n=21) |
|-----------------|------------|------------|-----------|
| Age             | ≥50        | 39         | 14        |
|                 | <50        | 40         | 7         |
| Gender          | Female     | 49         | 10        |
|                 | Male       | 30         | 11        |
| Survival status | Dead       | 29         | 17        |
|                 | Living     | 50         | 4         |
| Stage           | Stage1     | 9          | 1         |
|                 | Stage2     | 36         | 7         |
|                 | Stage3     | 16         | 1         |
|                 | Stage4     | 16         | 4         |
|                 | Recurrence | -          | 8         |
| T               | unknown    | 2          | -         |
|                 | T1         | 9          | -         |
|                 | T2         | 41         | -         |
|                 | T3         | 8          | -         |
|                 | T4         | 19         | -         |
| N               | unknown    | 2          | -         |
|                 | NO         | 68         | -         |
|                 | N1         | 9          | -         |
| M               | unknown    | 2          | -         |
|                 | M0         | 61         | -         |
|                 | M1         | 16         | -         |
|                 | unknown    | 2          | -         |

**Table S2.** 103 ferroptosis-related genes downloaded from the GeneCards.

| <b>Gene Symbol</b> | <b>Description</b>                                     | <b>Category</b> |
|--------------------|--------------------------------------------------------|-----------------|
| GPX4               | Glutathione Peroxidase 4                               | Protein Coding  |
| AIFM2              | Apoptosis Inducing Factor Mitochondria Associated 2    | Protein Coding  |
| TP53               | Tumor Protein P53                                      | Protein Coding  |
| ACSL4              | Acyl-CoA Synthetase Long Chain Family Member 4         | Protein Coding  |
| SLC7A11            | Solute Carrier Family 7 Member 11                      | Protein Coding  |
| VDAC2              | Voltage Dependent Anion Channel 2                      | Protein Coding  |
| VDAC3              | Voltage Dependent Anion Channel 3                      | Protein Coding  |
| ATG5               | Autophagy Related 5                                    | Protein Coding  |
| ATG7               | Autophagy Related 7                                    | Protein Coding  |
| NCOA4              | Nuclear Receptor Coactivator 4                         | Protein Coding  |
| HMOX1              | Heme Oxygenase 1                                       | Protein Coding  |
| SLC3A2             | Solute Carrier Family 3 Member 2                       | Protein Coding  |
| ALOX15             | Arachidonate 15-Lipoxygenase                           | Protein Coding  |
| BECN1              | Beclin 1                                               | Protein Coding  |
| PRKAA1             | Protein Kinase AMP-Activated Catalytic Subunit Alpha 1 | Protein Coding  |
| SAT1               | Spermidine/Spermine N1-Acetyltransferase 1             | Protein Coding  |
| NF2                | Neurofibromin 2                                        | Protein Coding  |
| YAP1               | Yes1 Associated Transcriptional Regulator              | Protein Coding  |
| FTH1               | Ferritin Heavy Chain 1                                 | Protein Coding  |
| TF                 | Transferrin                                            | Protein Coding  |
| TFRC               | Transferrin Receptor                                   | Protein Coding  |
| FTL                | Ferritin Light Chain                                   | Protein Coding  |
| CYBB               | Cytochrome B-245 Beta Chain                            | Protein Coding  |
| GSS                | Glutathione Synthetase                                 | Protein Coding  |
| CP                 | Ceruloplasmin                                          | Protein Coding  |
| PRNP               | Prion Protein                                          | Protein Coding  |
| SLC11A2            | Solute Carrier Family 11 Member 2                      | Protein Coding  |
| SLC40A1            | Solute Carrier Family 40 Member 1                      | Protein Coding  |
| STEAP3             | STEAP3 Metalloreductase                                | Protein Coding  |
| ACSL1              | Acyl-CoA Synthetase Long Chain Family Member 1         | Protein Coding  |
| GCLC               | Glutamate-Cysteine Ligase Catalytic Subunit            | Protein Coding  |
| MAP1LC3A           | Microtubule Associated Protein 1 Light Chain 3 Alpha   | Protein Coding  |
| MAP1LC3B           | Microtubule Associated Protein 1 Light Chain 3 Beta    | Protein Coding  |
| SLC39A14           | Solute Carrier Family 39 Member 14                     | Protein Coding  |
| SLC39A8            | Solute Carrier Family 39 Member 8                      | Protein Coding  |
| ACSL5              | Acyl-CoA Synthetase Long Chain Family Member 5         | Protein Coding  |
| GCLM               | Glutamate-Cysteine Ligase Modifier Subunit             | Protein Coding  |
| PCBP1              | Poly(RC) Binding Protein 1                             | Protein Coding  |
| PCBP2              | Poly(RC) Binding Protein 2                             | Protein Coding  |
| ACSL3              | Acyl-CoA Synthetase Long Chain Family Member 3         | Protein Coding  |

|           |                                                          |                |
|-----------|----------------------------------------------------------|----------------|
| ACSL6     | Acyl-CoA Synthetase Long Chain Family Member 6           | Protein Coding |
| SAT2      | Spermidine/Spermine N1-Acetyltransferase Family Member 2 | Protein Coding |
| FTMT      | Ferritin Mitochondrial                                   | Protein Coding |
| LPCAT3    | Lysophosphatidylcholine Acyltransferase 3                | Protein Coding |
| MAP1LC3C  | Microtubule Associated Protein 1 Light Chain 3 Gamma     | Protein Coding |
| MAP1LC3B2 | Microtubule Associated Protein 1 Light Chain 3 Beta 2    | Protein Coding |
| BAP1      | BRCA1 Associated Protein 1                               | Protein Coding |

---
